# Supplementary material
Source: PubMed Central journal article supplement (PMC3748222)
Supplement: NIHMS436925-supplement-2.pdf [file NIHMS436925-supplement-2.pdf]

ALGISYL-LVR WITH CORONARY ARTERY  
BYPASS GRAFTING REDUCES LEFT  
VENTRICULAR WALL STRESS AND IMPROVES  
FUNCTION IN THE FAILING HUMAN HEART  
(SUPPLEMENTARY MATERIALS)

Lik Chuan Lee, Samuel T. Wall, Doron Klepach, Liang Ge, Zhihong Zhang, Randall J. Lee, Andy Hinson, Joseph H. Gorman III, Robert C. Gorman, Julius M. Guccione

# Long axis view Patient 1

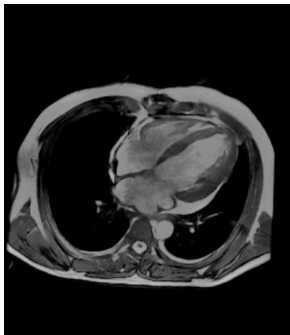

Baseline

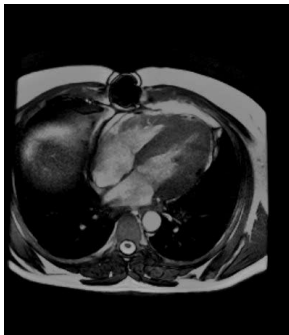

3 months

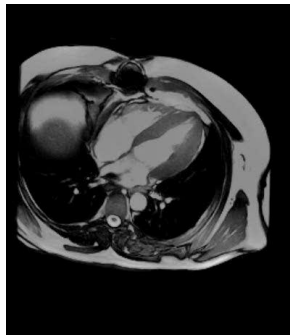

6 months

## Long axis view Patient 2

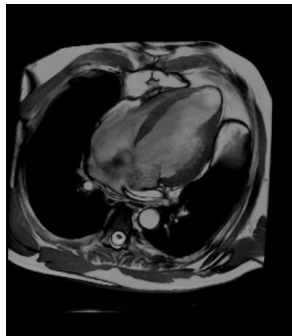

Baseline

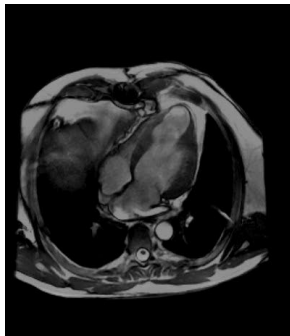

3 months

## Long axis view Patient 3

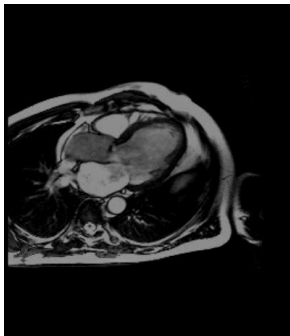

Baseline

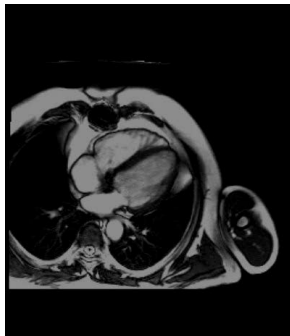

3 months

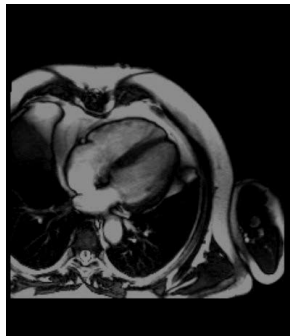

6 months

## Short axis view Patient 1 at Basal Region

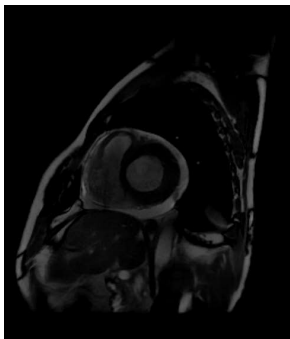

Baseline

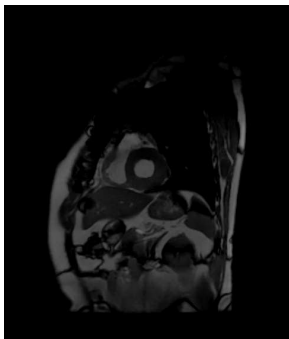

3 months

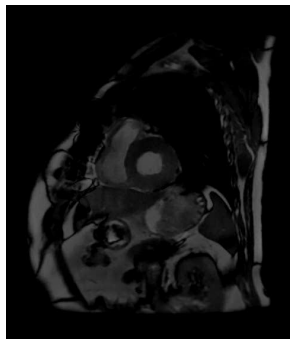

6 months

## Short axis view Patient 2 at Basal Region

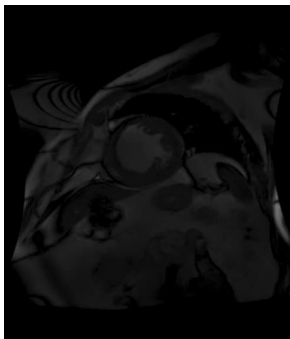

Baseline

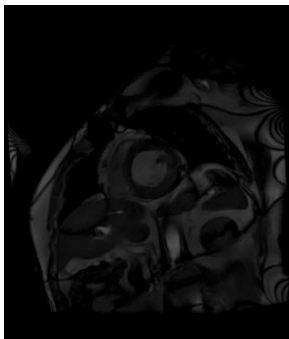

3 months

## Short axis view Patient 3 at Basal Region

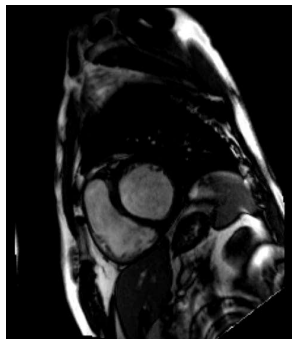

Baseline

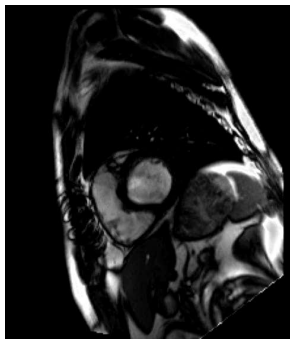

3 months

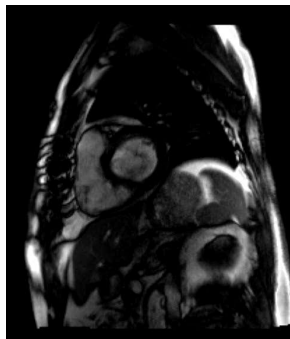

6 months

## Short axis view Patient 1 at Mid Ventricle Region

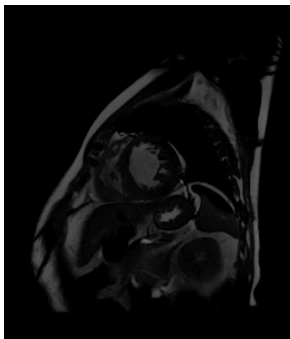

Baseline

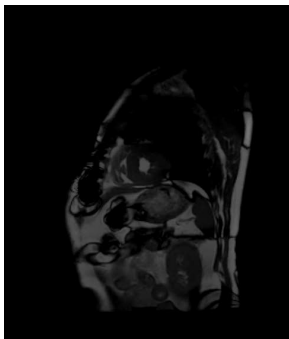

3 months

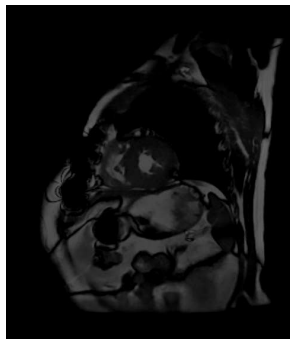

6 months



## Short axis view Patient 2 at Mid Ventricle Region

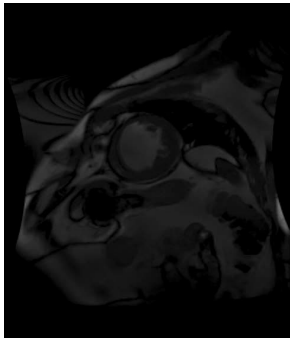

Baseline

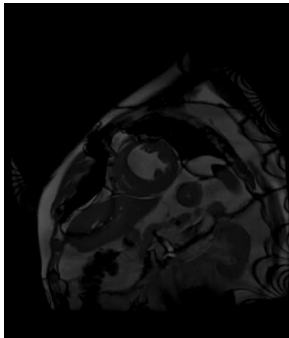

3 months

## Short axis view Patient 3 at Mid Ventricle Region

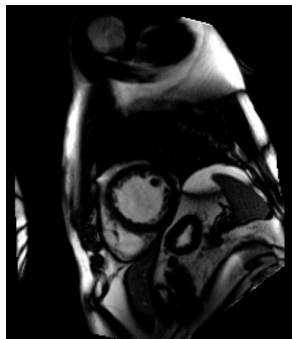

Baseline

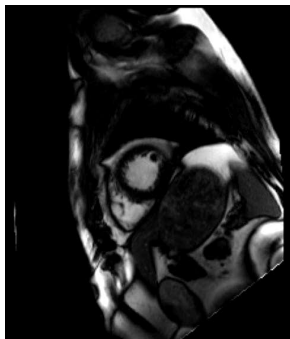

3 months

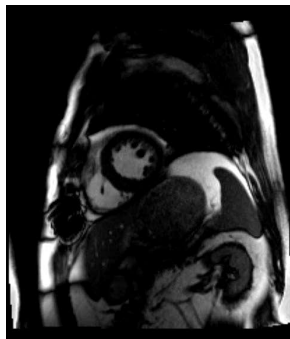

6 months

## Short axis view Patient 1 at Apical Region

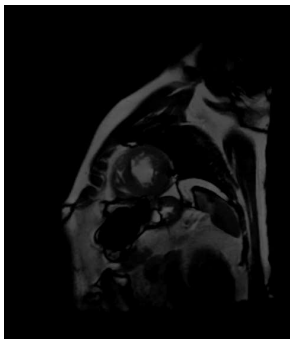

Baseline

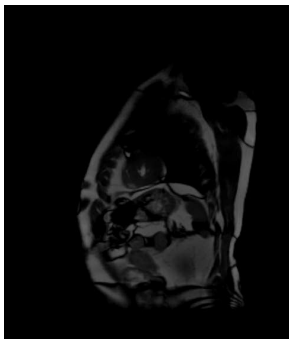

3 months

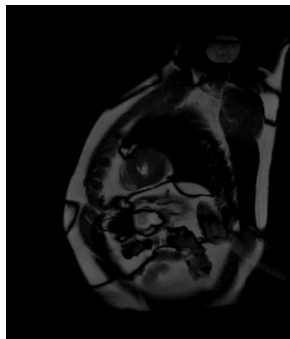

6 months

## Short axis view Patient 2 at Apical Region

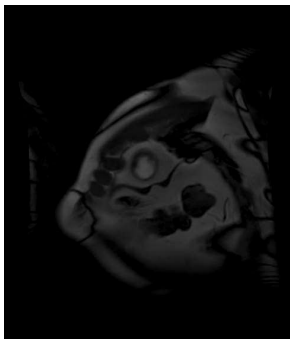

Baseline

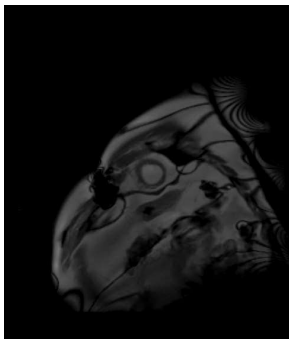

3 months

## Short axis view Patient 3 at Apical Region

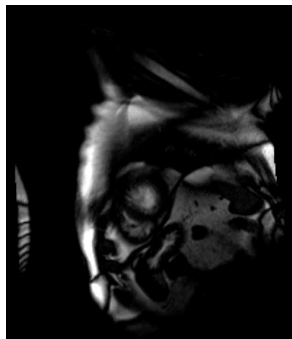

Baseline

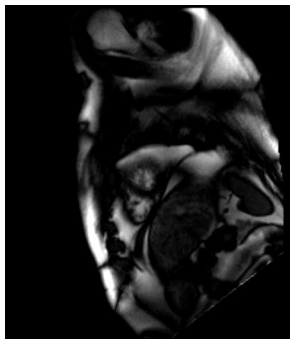

3 months

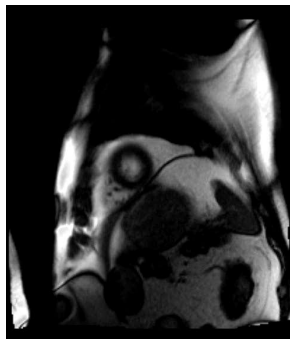

6 months
